# Supplementary material
Source: publisher figshare collection journal article supplement (https://acs.figshare.com/ndownloader/files/5335867)
Supplement: Supplementary file 1 [file 5335867]

 
data_fm 
 
_audit_creation_method            SHELXL-97 
_chemical_formula_sum 
 'C4 H22 N3 O17.50 P4 Zn3' 
_chemical_formula_weight          712.24 
 
loop_ 
 _atom_type_symbol 
 _atom_type_description 
 _atom_type_scat_dispersion_real 
 _atom_type_scat_dispersion_imag 
 _atom_type_scat_source 
 'C'  'C'   0.0033   0.0016 
 'International Tables Vol C Tables 4.2.6.8 and 6.1.1.4' 
 'H'  'H'   0.0000   0.0000 
 'International Tables Vol C Tables 4.2.6.8 and 6.1.1.4' 
 'N'  'N'   0.0061   0.0033 
 'International Tables Vol C Tables 4.2.6.8 and 6.1.1.4' 
 'O'  'O'   0.0106   0.0060 
 'International Tables Vol C Tables 4.2.6.8 and 6.1.1.4' 
 'P'  'P'   0.1023   0.0942 
 'International Tables Vol C Tables 4.2.6.8 and 6.1.1.4' 
 'Zn'  'Zn'   0.2839   1.4301 
 'International Tables Vol C Tables 4.2.6.8 and 6.1.1.4' 
 
_symmetry_cell_setting            Triclinic 
_symmetry_space_group_name_H-M    P-1 
 
loop_ 
 _symmetry_equiv_pos_as_xyz 
 'x, y, z' 
 '-x, -y, -z' 
 
_cell_length_a                    8.4552(7) 
_cell_length_b                    10.0614(8) 
_cell_length_c                    12.8218(10) 
_cell_angle_alpha                 109.0120(10) 
_cell_angle_beta                  90.922(2) 
_cell_angle_gamma                 91.298(2) 
_cell_volume                      1030.68(14) 
_cell_formula_units_Z             2 
_cell_measurement_temperature     294(2) 
_cell_measurement_reflns_used     6224 
_cell_measurement_theta_min       1.68 
_cell_measurement_theta_max       28.33 
 
_exptl_crystal_description        columnar 
_exptl_crystal_colour             transparent 
_exptl_crystal_size_max           0.30 
_exptl_crystal_size_mid           0.12 
_exptl_crystal_size_min           0.10 
_exptl_crystal_density_meas       'not measured' 
_exptl_crystal_density_diffrn     2.295 
_exptl_crystal_density_method     'not measured' 
_exptl_crystal_F_000              714 
_exptl_absorpt_coefficient_mu     3.863 
_exptl_absorpt_correction_type    Empirical 
_exptl_absorpt_correction_T_min   0.622 
_exptl_absorpt_correction_T_max   0.951 
_exptl_absorpt_process_details    none 
 
_exptl_special_details 
; 
 ? 
; 
 
_diffrn_ambient_temperature       294(2) 
_diffrn_radiation_wavelength      0.71073 
_diffrn_radiation_type            MoK\a 
_diffrn_radiation_source          'fine-focus sealed tube' 
_diffrn_radiation_monochromator   graphite 
_diffrn_measurement_device_type   'Bruker APEX CCD area detector' 
_diffrn_measurement_method        'phi and omega scans' 
_diffrn_reflns_number             11962 
_diffrn_reflns_av_R_equivalents   0.0391 
_diffrn_reflns_av_sigmaI/netI     0.0407 
_diffrn_reflns_limit_h_min        -11 
_diffrn_reflns_limit_h_max        11 
_diffrn_reflns_limit_k_min        -13 
_diffrn_reflns_limit_k_max        13 
_diffrn_reflns_limit_l_min        -16 
_diffrn_reflns_limit_l_max        17 
_diffrn_reflns_theta_min          1.68 
_diffrn_reflns_theta_max          28.33 
_reflns_number_total              5106 
_reflns_number_gt                 4303 
_reflns_threshold_expression      >2sigma(I) 
 
_computing_data_collection        'Bruker APEX' 
_computing_cell_refinement        'Bruker APEX' 
_computing_data_reduction         'Bruker SHELXTL'  
_computing_structure_solution     'SHELXS-97 (Sheldrick, 1990)' 
_computing_structure_refinement   'SHELXL-97 (Sheldrick, 1997)' 
_computing_molecular_graphics     'Bruker SHELXTL'  
_computing_publication_material   'Bruker SHELXTL'  
 
_refine_special_details 
; 
 Refinement of F^2^ against ALL reflections.  The weighted R-factor wR and 
 goodness of fit S are based on F^2^, conventional R-factors R are based 
 on F, with F set to zero for negative F^2^. The threshold expression of 
 F^2^ > 2sigma(F^2^) is used only for calculating R-factors(gt) etc. and is 
 not relevant to the choice of reflections for refinement.  R-factors based 
 on F^2^ are statistically about twice as large as those based on F, and R- 
 factors based on ALL data will be even larger. 
; 
 
_refine_ls_structure_factor_coef  Fsqd  
_refine_ls_matrix_type            full 
_refine_ls_weighting_scheme       calc  
_refine_ls_weighting_details 
 'calc w=1/[\s^2^(Fo^2^)+(0.0461P)^2^+0.6604P] where P=(Fo^2^+2Fc^2^)/3' 
_atom_sites_solution_primary      direct 
_atom_sites_solution_secondary    difmap 
_atom_sites_solution_hydrogens    geom 
_refine_ls_hydrogen_treatment     constr 
_refine_ls_extinction_method      none 
_refine_ls_number_reflns          5106 
_refine_ls_number_parameters      289 
_refine_ls_number_restraints      0 
_refine_ls_R_factor_all           0.0361 
_refine_ls_R_factor_gt            0.0296 
_refine_ls_wR_factor_ref          0.0914 
_refine_ls_wR_factor_gt           0.0894 
_refine_ls_goodness_of_fit_ref    1.078 
_refine_ls_restrained_S_all       1.078 
_refine_ls_shift/su_max           0.001 
_refine_ls_shift/su_mean          0.000 
 
loop_ 
 _atom_site_label 
 _atom_site_type_symbol 
 _atom_site_fract_x 
 _atom_site_fract_y 
 _atom_site_fract_z 
 _atom_site_U_iso_or_equiv 
 _atom_site_adp_type 
 _atom_site_occupancy 
 _atom_site_symmetry_multiplicity 
 _atom_site_calc_flag 
 _atom_site_refinement_flags 
 _atom_site_disorder_assembly 
 _atom_site_disorder_group 
Zn1 Zn 0.05299(4) 0.18217(4) 0.15604(3) 0.01820(10) Uani 1 1 d . . . 
Zn2 Zn 0.25982(4) -0.00168(4) 0.54517(3) 0.01592(9) Uani 1 1 d . . . 
Zn3 Zn 0.18587(4) 0.38327(4) 0.48538(3) 0.01797(10) Uani 1 1 d . . . 
P1 P 0.01905(9) 0.48974(8) 0.30993(7) 0.01720(16) Uani 1 1 d . . . 
P2 P 0.06043(9) 0.08686(8) 0.37536(6) 0.01519(16) Uani 1 1 d . . . 
P3 P 0.50830(9) -0.25216(9) 0.44890(7) 0.01707(17) Uani 1 1 d . . . 
P4 P 0.22787(9) 0.05194(9) -0.07087(7) 0.01842(17) Uani 1 1 d . . . 
O1 O 0.1708(3) 0.4796(3) 0.3752(2) 0.0232(5) Uani 1 1 d . . . 
O2 O -0.1285(3) 0.4772(2) 0.37356(19) 0.0246(5) Uani 1 1 d . . . 
O3 O 0.0263(3) 0.6401(3) 0.2939(2) 0.0278(5) Uani 1 1 d . . . 
O4 O 0.0137(3) 0.3831(3) 0.1941(2) 0.0291(5) Uani 1 1 d . . . 
O5 O 0.1739(3) -0.0177(2) 0.40046(19) 0.0232(5) Uani 1 1 d . . . 
O6 O 0.0493(3) 0.2208(2) 0.47667(19) 0.0227(5) Uani 1 1 d . . . 
O7 O -0.1071(3) 0.0155(3) 0.34531(18) 0.0220(5) Uani 1 1 d . . . 
O8 O 0.1257(3) 0.1223(3) 0.27649(19) 0.0255(5) Uani 1 1 d . . . 
O9 O 0.4009(3) -0.3472(3) 0.3483(2) 0.0323(6) Uani 1 1 d . . . 
O10 O 0.4042(3) -0.1551(3) 0.5354(2) 0.0287(5) Uani 1 1 d . . . 
O11 O 0.6145(3) -0.1730(3) 0.39210(19) 0.0248(5) Uani 1 1 d . . . 
O12 O 0.5934(3) -0.3453(3) 0.5021(2) 0.0278(5) Uani 1 1 d . . . 
O13 O 0.2190(3) 0.1365(3) 0.05098(19) 0.0281(5) Uani 1 1 d . . . 
O14 O 0.1564(3) -0.0996(3) -0.0988(2) 0.0273(5) Uani 1 1 d . . . 
O15 O 0.1228(3) 0.1310(3) -0.1338(2) 0.0276(5) Uani 1 1 d . . . 
O16 O 0.3975(3) 0.0412(3) -0.1082(2) 0.0294(6) Uani 1 1 d . . . 
N1 N 0.3583(4) -0.2583(3) 0.7113(2) 0.0268(6) Uani 1 1 d . . . 
N2 N 0.4071(3) -0.2479(3) 0.9555(2) 0.0248(6) Uani 1 1 d . . . 
N3 N 0.3766(4) -0.1370(4) 1.2216(3) 0.0353(7) Uani 1 1 d . . . 
C1 C 0.5087(4) -0.2846(4) 0.7643(3) 0.0288(8) Uani 1 1 d . . . 
C2 C 0.4778(5) -0.3499(4) 0.8543(3) 0.0328(8) Uani 1 1 d . . . 
C3 C 0.3486(6) -0.3214(4) 1.0336(4) 0.0464(11) Uani 1 1 d . . . 
C4 C 0.2631(5) -0.2212(5) 1.1321(3) 0.0395(10) Uani 1 1 d . . . 
OW1 O 0.3139(6) 0.3549(5) -0.1651(4) 0.0871(14) Uani 1 1 d . . . 
OW2 O 0.060(3) 0.4500(12) -0.0059(13) 0.192(13) Uani 0.50 1 d P . . 
H4 H 0.4773 -0.1733 0.9902 0.050 Uiso 1 1 d . . . 
H10 H 0.3294 -0.4035 0.3639 0.050 Uiso 1 1 d . . . 
H1 H 0.3787 -0.2217 0.6568 0.050 Uiso 1 1 d . . . 
H5 H 0.3201 -0.2069 0.9446 0.050 Uiso 1 1 d . . . 
H2 H 0.3113 -0.1931 0.7603 0.050 Uiso 1 1 d . . . 
H6 H 0.4479 -0.0801 1.1959 0.050 Uiso 1 1 d . . . 
H7 H 0.3213 -0.0667 1.2807 0.050 Uiso 1 1 d . . . 
H3 H 0.2978 -0.3403 0.6897 0.050 Uiso 1 1 d . . . 
H8 H 0.4233 -0.2132 1.2375 0.050 Uiso 1 1 d . . . 
H9 H 0.0091 0.7192 0.3614 0.050 Uiso 1 1 d . . . 
H11 H 0.1219 0.0825 -0.2068 0.050 Uiso 1 1 d . . . 
H12 H 0.3678 0.3392 -0.2269 0.050 Uiso 1 1 d . . . 
H13 H 0.2844 0.4409 -0.1418 0.050 Uiso 1 1 d . . . 
 
loop_ 
 _atom_site_aniso_label 
 _atom_site_aniso_U_11 
 _atom_site_aniso_U_22 
 _atom_site_aniso_U_33 
 _atom_site_aniso_U_23 
 _atom_site_aniso_U_13 
 _atom_site_aniso_U_12 
Zn1 0.01631(17) 0.02178(19) 0.01505(18) 0.00403(14) 0.00055(13) 0.00014(14) 
Zn2 0.01395(16) 0.01845(18) 0.01592(18) 0.00631(14) 0.00136(13) 0.00044(13) 
Zn3 0.01571(17) 0.01853(19) 0.01990(19) 0.00640(14) 0.00216(13) 0.00168(13) 
P1 0.0188(4) 0.0160(4) 0.0161(4) 0.0042(3) 0.0015(3) 0.0016(3) 
P2 0.0138(3) 0.0185(4) 0.0135(4) 0.0055(3) 0.0005(3) -0.0010(3) 
P3 0.0126(3) 0.0187(4) 0.0211(4) 0.0081(3) 0.0009(3) -0.0001(3) 
P4 0.0152(4) 0.0234(4) 0.0142(4) 0.0028(3) 0.0012(3) 0.0001(3) 
O1 0.0187(11) 0.0274(12) 0.0275(13) 0.0146(10) -0.0007(9) -0.0021(9) 
O2 0.0212(11) 0.0239(12) 0.0233(12) 0.0002(10) 0.0049(9) -0.0032(9) 
O3 0.0354(13) 0.0207(12) 0.0294(13) 0.0108(10) 0.0003(11) 0.0035(10) 
O4 0.0441(15) 0.0224(12) 0.0174(12) 0.0013(10) 0.0021(10) 0.0085(11) 
O5 0.0266(12) 0.0244(12) 0.0185(11) 0.0063(9) -0.0007(9) 0.0079(9) 
O6 0.0228(11) 0.0187(11) 0.0236(12) 0.0027(9) 0.0036(9) -0.0030(9) 
O7 0.0168(10) 0.0306(13) 0.0170(11) 0.0060(10) 0.0005(8) -0.0076(9) 
O8 0.0179(11) 0.0415(15) 0.0228(12) 0.0185(11) 0.0021(9) -0.0031(10) 
O9 0.0303(13) 0.0381(15) 0.0282(14) 0.0121(12) -0.0048(11) -0.0190(11) 
O10 0.0312(13) 0.0290(13) 0.0306(14) 0.0147(11) 0.0106(11) 0.0136(11) 
O11 0.0230(11) 0.0269(13) 0.0245(12) 0.0091(10) 0.0004(9) -0.0096(10) 
O12 0.0178(11) 0.0312(14) 0.0412(15) 0.0207(12) 0.0024(10) 0.0046(10) 
O13 0.0205(11) 0.0422(15) 0.0164(12) 0.0021(10) 0.0030(9) -0.0003(10) 
O14 0.0196(11) 0.0258(13) 0.0357(14) 0.0099(11) -0.0077(10) -0.0046(10) 
O15 0.0339(13) 0.0263(13) 0.0210(12) 0.0056(10) -0.0043(10) 0.0048(10) 
O16 0.0193(11) 0.0384(15) 0.0271(13) 0.0056(11) 0.0090(10) -0.0002(10) 
N1 0.0295(15) 0.0274(15) 0.0203(14) 0.0037(12) 0.0035(12) -0.0019(12) 
N2 0.0280(14) 0.0236(15) 0.0219(14) 0.0064(12) 0.0004(12) 0.0014(12) 
N3 0.0324(16) 0.051(2) 0.0242(16) 0.0136(15) 0.0094(13) 0.0105(15) 
C1 0.0253(17) 0.036(2) 0.0264(19) 0.0123(16) 0.0050(14) 0.0027(15) 
C2 0.045(2) 0.0271(19) 0.0263(19) 0.0073(15) 0.0086(16) 0.0093(16) 
C3 0.080(3) 0.028(2) 0.034(2) 0.0129(18) 0.022(2) 0.001(2) 
C4 0.043(2) 0.044(2) 0.029(2) 0.0080(18) 0.0096(17) -0.0054(19) 
OW1 0.112(4) 0.054(2) 0.089(3) 0.015(2) 0.010(3) -0.006(2) 
OW2 0.37(3) 0.099(12) 0.076(7) -0.005(10) 0.053(13) -0.123(18) 
 
_geom_special_details 
; 
 All esds (except the esd in the dihedral angle between two l.s. planes) 
 are estimated using the full covariance matrix.  The cell esds are taken 
 into account individually in the estimation of esds in distances, angles 
 and torsion angles; correlations between esds in cell parameters are only 
 used when they are defined by crystal symmetry.  An approximate (isotropic) 
 treatment of cell esds is used for estimating esds involving l.s. planes. 
; 
 
loop_ 
 _geom_bond_atom_site_label_1 
 _geom_bond_atom_site_label_2 
 _geom_bond_distance 
 _geom_bond_site_symmetry_2 
 _geom_bond_publ_flag 
Zn1 O13 1.919(2) . ? 
Zn1 O8 1.928(2) . ? 
Zn1 O4 1.957(2) . ? 
Zn1 O14 1.964(2) 2 ? 
Zn2 O5 1.937(2) . ? 
Zn2 O11 1.957(2) 2_656 ? 
Zn2 O7 1.959(2) 2_556 ? 
Zn2 O10 1.963(2) . ? 
Zn3 O12 1.928(2) 2_656 ? 
Zn3 O6 1.951(2) . ? 
Zn3 O1 1.960(2) . ? 
Zn3 O2 1.970(2) 2_566 ? 
P1 O4 1.522(2) . ? 
P1 O2 1.527(2) . ? 
P1 O1 1.544(2) . ? 
P1 O3 1.592(2) . ? 
P2 O8 1.532(2) . ? 
P2 O6 1.543(2) . ? 
P2 O5 1.544(2) . ? 
P2 O7 1.558(2) . ? 
P3 O12 1.514(2) . ? 
P3 O10 1.524(3) . ? 
P3 O11 1.529(2) . ? 
P3 O9 1.588(2) . ? 
P4 O16 1.514(2) . ? 
P4 O13 1.520(2) . ? 
P4 O14 1.553(2) . ? 
P4 O15 1.581(3) . ? 
O2 Zn3 1.970(2) 2_566 ? 
O3 H9 0.9815 . ? 
O7 Zn2 1.959(2) 2_556 ? 
O9 H10 0.8882 . ? 
O11 Zn2 1.957(2) 2_656 ? 
O12 Zn3 1.928(2) 2_656 ? 
O14 Zn1 1.964(2) 2 ? 
O15 H11 0.9036 . ? 
N1 C1 1.502(5) . ? 
N1 H1 0.9065 . ? 
N1 H2 0.8568 . ? 
N1 H3 0.9203 . ? 
N2 C3 1.509(5) . ? 
N2 C2 1.510(5) . ? 
N2 H4 0.9310 . ? 
N2 H5 0.8827 . ? 
N3 C4 1.500(5) . ? 
N3 H6 0.9559 . ? 
N3 H7 0.9853 . ? 
N3 H8 0.9476 . ? 
C1 C2 1.525(5) . ? 
C3 C4 1.538(6) . ? 
OW1 H12 0.8915 . ? 
OW1 H13 0.8630 . ? 
OW2 OW2 1.42(4) 2_565 ? 
 
loop_ 
 _geom_angle_atom_site_label_1 
 _geom_angle_atom_site_label_2 
 _geom_angle_atom_site_label_3 
 _geom_angle 
 _geom_angle_site_symmetry_1 
 _geom_angle_site_symmetry_3 
 _geom_angle_publ_flag 
O13 Zn1 O8 105.20(10) . . ? 
O13 Zn1 O4 108.30(11) . . ? 
O8 Zn1 O4 115.40(11) . . ? 
O13 Zn1 O14 115.18(11) . 2 ? 
O8 Zn1 O14 111.82(10) . 2 ? 
O4 Zn1 O14 101.25(11) . 2 ? 
O5 Zn2 O11 111.16(10) . 2_656 ? 
O5 Zn2 O7 116.35(10) . 2_556 ? 
O11 Zn2 O7 108.36(10) 2_656 2_556 ? 
O5 Zn2 O10 110.52(10) . . ? 
O11 Zn2 O10 106.07(11) 2_656 . ? 
O7 Zn2 O10 103.66(10) 2_556 . ? 
O12 Zn3 O6 112.03(10) 2_656 . ? 
O12 Zn3 O1 106.30(10) 2_656 . ? 
O6 Zn3 O1 121.56(10) . . ? 
O12 Zn3 O2 107.08(11) 2_656 2_566 ? 
O6 Zn3 O2 103.10(10) . 2_566 ? 
O1 Zn3 O2 105.75(11) . 2_566 ? 
O4 P1 O2 111.57(14) . . ? 
O4 P1 O1 112.17(14) . . ? 
O2 P1 O1 110.94(14) . . ? 
O4 P1 O3 105.74(14) . . ? 
O2 P1 O3 109.41(14) . . ? 
O1 P1 O3 106.72(13) . . ? 
O8 P2 O6 110.85(14) . . ? 
O8 P2 O5 107.29(14) . . ? 
O6 P2 O5 110.56(13) . . ? 
O8 P2 O7 109.74(13) . . ? 
O6 P2 O7 109.22(13) . . ? 
O5 P2 O7 109.15(13) . . ? 
O12 P3 O10 107.87(15) . . ? 
O12 P3 O11 115.38(14) . . ? 
O10 P3 O11 112.87(14) . . ? 
O12 P3 O9 109.38(15) . . ? 
O10 P3 O9 109.57(15) . . ? 
O11 P3 O9 101.53(13) . . ? 
O16 P4 O13 110.97(14) . . ? 
O16 P4 O14 108.06(14) . . ? 
O13 P4 O14 112.75(15) . . ? 
O16 P4 O15 111.93(15) . . ? 
O13 P4 O15 105.89(14) . . ? 
O14 P4 O15 107.22(13) . . ? 
P1 O1 Zn3 125.39(13) . . ? 
P1 O2 Zn3 124.07(13) . 2_566 ? 
P1 O3 H9 114.4 . . ? 
P1 O4 Zn1 125.87(15) . . ? 
P2 O5 Zn2 125.21(14) . . ? 
P2 O6 Zn3 118.64(13) . . ? 
P2 O7 Zn2 123.80(13) . 2_556 ? 
P2 O8 Zn1 139.91(14) . . ? 
P3 O9 H10 116.2 . . ? 
P3 O10 Zn2 137.45(16) . . ? 
P3 O11 Zn2 129.97(15) . 2_656 ? 
P3 O12 Zn3 132.39(15) . 2_656 ? 
P4 O13 Zn1 134.88(15) . . ? 
P4 O14 Zn1 132.18(15) . 2 ? 
P4 O15 H11 109.0 . . ? 
C1 N1 H1 111.2 . . ? 
C1 N1 H2 106.8 . . ? 
H1 N1 H2 104.8 . . ? 
C1 N1 H3 108.1 . . ? 
H1 N1 H3 114.9 . . ? 
H2 N1 H3 110.8 . . ? 
C3 N2 C2 111.5(3) . . ? 
C3 N2 H4 112.1 . . ? 
C2 N2 H4 111.5 . . ? 
C3 N2 H5 100.6 . . ? 
C2 N2 H5 116.3 . . ? 
H4 N2 H5 104.2 . . ? 
C4 N3 H6 111.8 . . ? 
C4 N3 H7 111.3 . . ? 
H6 N3 H7 102.6 . . ? 
C4 N3 H8 97.8 . . ? 
H6 N3 H8 115.0 . . ? 
H7 N3 H8 118.7 . . ? 
N1 C1 C2 112.3(3) . . ? 
N2 C2 C1 112.6(3) . . ? 
N2 C3 C4 112.1(3) . . ? 
N3 C4 C3 112.2(4) . . ? 
H12 OW1 H13 110.0 . . ? 
 
_diffrn_measured_fraction_theta_max    0.991 
_diffrn_reflns_theta_full              28.33 
_diffrn_measured_fraction_theta_full   0.991 
_refine_diff_density_max    0.935 
_refine_diff_density_min   -0.851 
_refine_diff_density_rms    0.113 
